# Supplementary material for: Linking 21st Century Competencies to Academic Outcomes in Portugal
Source: Research Square preprint supplement (doi:10.21203/rs.3.rs-6326658/v1), 2025-07-04
Supplement: Supplementary file 1 [file d6b59c85adb88a3f950c7d85.xlsx]

## Sheet: English
SEM Pathways for English Academic Outcomes
Competency	Effect											Fit Statistics
Englishpre		Competency_Pre		Male		G7		G9		Yrs_School		χ2 / p(χ2)	RMSEA	CFI	TLI
Critical Thinking	direct	0.11***	(0.03)	-0.39**	(0.12)	0.71***	(0.15)	1.10***	(0.15)	0.00	(0.03)	1.75 / .18	0.056	0.996	0.944
	indirect	0.00	(.)	0.00	(.)	0.00	(.)	0.00	(.)	0.00	(.)
	total	0.11***	(0.03)	-0.39**	(0.12)	0.71***	(0.15)	1.10***	(0.15)	0.00	(0.03)
Creativity	direct	0.05	(0.03)	-0.38**	(0.13)	0.73***	(0.15)	1.18***	(0.15)	-0.01	(0.03)	.41 / .51	0	1	1.039
	indirect	0.00	(.)	0.00	(.)	0.00	(.)	0.00	(.)	0.00	(.)
	total	0.05	(0.03)	-0.38**	(0.13)	0.73***	(0.15)	1.18***	(0.15)	-0.01	(0.03)
Communication	direct	0.13***	(0.02)	-0.32**	(0.12)	0.69***	(0.14)	1.09***	(0.15)	-0.02	(0.03)	.02 / .89	0	1	1.062
	indirect	0.00	(.)	0.00	(.)	0.00	(.)	0.00	(.)	0.00	(.)
	total	0.13***	(0.02)	-0.32**	(0.12)	0.69***	(0.14)	1.09***	(0.15)	-0.02	(0.03)
Collaboration	direct	0.05	(0.03)	-0.33**	(0.13)	0.70***	(0.15)	1.17***	(0.15)	-0.02	(0.03)	.15 / .69	0	1	1.063
	indirect	0.00	(.)	0.00	(.)	0.00	(.)	0.00	(.)	0.00	(.)
	total	0.05	(0.03)	-0.33**	(0.13)	0.70***	(0.15)	1.17***	(0.15)	-0.02	(0.03)
Curiosity	direct	0.10***	(0.02)	-0.36**	(0.12)	0.72***	(0.15)	1.17***	(0.15)	0.00	(0.03)	1.69 / .19	0.054	0.96	0.953
	indirect	0.00	(.)	0.00	(.)	0.00	(.)	0.00	(.)	0.00	(.)
	total	0.10***	(0.02)	-0.36**	(0.12)	0.72***	(0.15)	1.17***	(0.15)	0.00	(0.03)
Ethics	direct	0.06*	(0.03)	-0.27*	(0.13)	0.69***	(0.15)	1.15***	(0.15)	-0.01	(0.03)	.03 / .87	0	1	1.073
	indirect	0.00	(.)	0.00	(.)	0.00	(.)	0.00	(.)	0.00	(.)
	total	0.06*	(0.03)	-0.27*	(0.13)	0.69***	(0.15)	1.15***	(0.15)	-0.01	(0.03)
Courage	direct	0.09***	(0.03)	-0.35**	(0.12)	0.73***	(0.15)	1.15***	(0.15)	-0.01	(0.03)	.00 / .97	0	1	1.07
	indirect	0.00	(.)	0.00	(.)	0.00	(.)	0.00	(.)	0.00	(.)
	total	0.09***	(0.03)	-0.35**	(0.12)	0.73***	(0.15)	1.15***	(0.15)	-0.01	(0.03)
Reslience	direct	0.10***	(0.02)	-0.45***	(0.12)	0.74***	(0.15)	1.20***	(0.15)	-0.01	(0.03)	1.71 / .19	0.05	0.996	0.951
	indirect	0.00	(.)	0.00	(.)	0.00	(.)	0.00	(.)	0.00	(.)
	total	0.10***	(0.02)	-0.45***	(0.12)	0.74***	(0.15)	1.20***	(0.15)	-0.01	(0.03)
Mindfulness	direct	0.06*	(0.03)	-0.38**	(0.13)	0.69***	(0.15)	1.15***	(0.15)	-0.01	(0.03)	.02 / .88	0	1	1.072
	indirect	0.00	(.)	0.00	(.)	0.00	(.)	0.00	(.)	0.00	(.)
	total	0.06*	(0.03)	-0.38**	(0.13)	0.69***	(0.15)	1.15***	(0.15)	-0.01	(0.03)
Leadership	direct	0.08**	(0.02)	-0.35**	(0.12)	0.71***	(0.15)	1.23***	(0.15)	-0.02	(0.03)	.18 / .67	0	1	1.06
	indirect	0.00	(.)	0.00	(.)	0.00	(.)	0.00	(.)	0.00	(.)
	total	0.08**	(0.02)	-0.35**	(0.12)	0.71***	(0.15)	1.23***	(0.15)	-0.02	(0.03)
Meta-Cognition	direct	0.03	(0.03)	-0.35**	(0.13)	0.70***	(0.15)	1.17***	(0.16)	-0.01	(0.03)	0.25 / .61	0	1	1.056
	indirect	0.00	(.)	0.00	(.)	0.00	(.)	0.00	(.)	0.00	(.)
	total	0.03	(0.03)	-0.35**	(0.13)	0.70***	(0.15)	1.17***	(0.16)	-0.01	(0.03)
Growth Mindset	direct	0.11***	(0.03)	-0.35**	(0.12)	0.67***	(0.15)	1.10***	(0.15)	-0.01	(0.03)	.74 /.39	0	1	1.017
	indirect	0.00	(.)	0.00	(.)	0.00	(.)	0.00	(.)	0.00	(.)
	total	0.11***	(0.03)	-0.35**	(0.12)	0.67***	(0.15)	1.10***	(0.15)	-0.01	(0.03)
Englishpost		Englishpre		Competency Pre		Male		G7		G9		Yrs_School		Competency Post
Critical Thinking	direct	0.57***	(0.06)	0.04	(0.03)	-0.32**	(0.11)	-0.13	(0.13)	-0.47**	(0.15)	-0.03	(0.02)	0.05	(0.03)
	indirect	0.00	(.)	0.06***	(0.02)	-0.23**	(0.07)	0.41***	(0.09)	0.63***	(0.11)	0.00	(0.02)	0.00	(.)
	total	0.57***	(0.06)	0.10***	(0.03)	-0.55***	(0.13)	0.27	(0.15)	0.17	(0.16)	-0.03	(0.03)	0.05	(0.03)
Creativity	direct	0.62***	(0.06)	-0.02	(0.03)	-0.25*	(0.11)	-0.15	(0.14)	-0.43**	(0.15)	-0.03	(0.02)	-0.01	(0.03)
	indirect	0.00	(.)	0.03	(0.02)	-0.23**	(0.08)	0.45***	(0.10)	0.73***	(0.12)	-0.01	(0.02)	0.00	(.)
	total	0.62***	(0.06)	0.01	(0.03)	-0.48***	(0.13)	0.30	(0.16)	0.31	(0.16)	-0.04	(0.03)	-0.01	(0.03)
Communication	direct	0.57***	(0.06)	0.02	(0.03)	-0.28**	(0.11)	-0.12	(0.13)	-0.38**	(0.15)	-0.03	(0.02)	0.06*	(0.03)
	indirect	0.00	(.)	0.07***	(0.02)	-0.18**	(0.07)	0.39***	(0.09)	0.62***	(0.11)	-0.01	(0.02)	0.00	(.)
	total	0.57***	(0.06)	0.10***	(0.03)	-0.47***	(0.13)	0.27	(0.15)	0.24	(0.16)	-0.04	(0.03)	0.06*	(0.03)
Collaboration	direct	0.61***	(0.06)	0.04	(0.03)	-0.28*	(0.11)	-0.12	(0.14)	-0.40**	(0.15)	-0.03	(0.02)	-0.03	(0.03)
	indirect	0.00	(.)	0.03	(0.02)	-0.20*	(0.08)	0.42***	(0.10)	0.71***	(0.11)	-0.01	(0.02)	0.00	(.)
	total	0.61***	(0.06)	0.07*	(0.03)	-0.48***	(0.13)	0.31	(0.16)	0.31	(0.16)	-0.04	(0.03)	-0.03	(0.03)
Curiosity	direct	0.58***	(0.06)	-0.00	(0.02)	-0.29**	(0.11)	-0.09	(0.13)	-0.36*	(0.15)	-0.03	(0.02)	0.06*	(0.02)
	indirect	0.00	(.)	0.06***	(0.01)	-0.21**	(0.07)	0.42***	(0.09)	0.68***	(0.11)	0.00	(0.02)	0.00	(.)
	total	0.58***	(0.06)	0.05	(0.03)	-0.50***	(0.13)	0.33*	(0.15)	0.32*	(0.16)	-0.03	(0.03)	0.06*	(0.02)
Ethics	direct	0.61***	(0.06)	0.01	(0.03)	-0.25*	(0.11)	-0.14	(0.14)	-0.42**	(0.15)	-0.03	(0.02)	0.01	(0.02)
	indirect	0.00	(.)	0.04*	(0.02)	-0.17*	(0.08)	0.42***	(0.10)	0.70***	(0.11)	-0.00	(0.02)	0.00	(.)
	total	0.61***	(0.06)	0.05	(0.03)	-0.42**	(0.14)	0.28	(0.16)	0.28	(0.17)	-0.04	(0.03)	0.01	(0.02)
Courage	direct	0.61***	(0.06)	0.00	(0.03)	-0.28*	(0.11)	-0.14	(0.14)	-0.41**	(0.15)	-0.03	(0.02)	0.03	(0.03)
	indirect	0.00	(.)	0.06***	(0.02)	-0.21**	(0.08)	0.44***	(0.10)	0.70***	(0.11)	-0.01	(0.02)	0.00	(.)
	total	0.61***	(0.06)	0.06	(0.03)	-0.49***	(0.13)	0.30	(0.16)	0.28	(0.16)	-0.04	(0.03)	0.03	(0.03)
Reslience	direct	0.61***	(0.06)	0.01	(0.03)	-0.28*	(0.11)	-0.13	(0.14)	-0.41**	(0.15)	-0.03	(0.02)	0.00	(0.03)
	indirect	0.00	(.)	0.06***	(0.02)	-0.27***	(0.08)	0.45***	(0.10)	0.73***	(0.11)	-0.01	(0.02)	0.00	(.)
	total	0.61***	(0.06)	0.07*	(0.03)	-0.55***	(0.13)	0.32*	(0.16)	0.32*	(0.16)	-0.04	(0.03)	0.00	(0.03)
Mindfulness	direct	0.60***	(0.06)	0.04	(0.03)	-0.29**	(0.11)	-0.13	(0.13)	-0.43**	(0.15)	-0.03	(0.02)	-0.02	(0.03)
	indirect	0.00	(.)	0.04*	(0.02)	-0.23**	(0.08)	0.41***	(0.10)	0.69***	(0.11)	-0.01	(0.02)	0.00	(.)
	total	0.60***	(0.06)	0.08*	(0.03)	-0.51***	(0.13)	0.28	(0.16)	0.27	(0.16)	-0.04	(0.03)	-0.02	(0.03)
Leadership	direct	0.61***	(0.06)	0.01	(0.03)	-0.27*	(0.11)	-0.13	(0.14)	-0.40**	(0.15)	-0.03	(0.02)	-0.01	(0.03)
	indirect	0.00	(.)	0.05**	(0.02)	-0.21**	(0.08)	0.43***	(0.10)	0.75***	(0.12)	-0.01	(0.02)	0.00	(.)
	total	0.61***	(0.06)	0.06*	(0.03)	-0.49***	(0.13)	0.31	(0.16)	0.34*	(0.16)	-0.05	(0.03)	-0.01	(0.03)
Meta-Cognition	direct	0.61***	(0.06)	0.02	(0.02)	-0.28*	(0.11)	-0.15	(0.13)	-0.41**	(0.15)	-0.03	(0.02)	0.02	(0.02)
	indirect	0.00	(.)	0.02	(0.02)	-0.21**	(0.08)	0.42***	(0.10)	0.71***	(0.12)	-0.00	(0.02)	0.00	(.)
	total	0.61***	(0.06)	0.04	(0.03)	-0.49***	(0.13)	0.28	(0.16)	0.30	(0.16)	-0.03	(0.03)	0.02	(0.02)
Growth Mindset	direct	0.58***	(0.06)	0.02	(0.03)	-0.28**	(0.11)	-0.12	(0.13)	-0.41**	(0.15)	-0.04	(0.02)	0.05*	(0.03)
	indirect	0.00	(.)	0.06***	(0.02)	-0.20**	(0.07)	0.39***	(0.09)	0.64***	(0.11)	-0.01	(0.02)	0.00	(.)
	total	0.58***	(0.06)	0.08**	(0.03)	-0.49***	(0.13)	0.27	(0.15)	0.23	(0.16)	-0.04	(0.03)	0.05*	(0.03)
Note: N=237, (SE), * p<0.05 ** p<0.01 *** p<0.001, Chi^2 df (1) for all models

## Sheet: Math
SEM Pathways for Math Academic Outcomes
Competency	Effect											Fit Statistics
Mathpre		Competency_Pre		Male		G7		G9		Yrs_School		χ2 / p(χ2)	RMSEA	CFI	TLI
Critical Thinking	direct	0.14***	(0.03)	0.12	(0.15)	0.19	(0.18)	-0.40*	(0.18)	0.10**	(0.03)	7.12 / .00	0.16	0.979	0.732
	indirect	0.00	(.)	0.00	(.)	0.00	(.)	0.00	(.)	0.00	(.)
	total	0.14***	(0.03)	0.12	(0.15)	0.19	(0.18)	-0.40*	(0.18)	0.10**	(0.03)
Creativity	direct	0.08*	(0.03)	0.12	(0.16)	0.23	(0.19)	-0.31	(0.19)	0.09*	(0.03)	.87 / .35	0	1	1.005
	indirect	0.08*	(.)	0.00	(.)	0.00	(.)	0.00	(.)	0.00	(.)
	total		(0.03)	0.12	(0.16)	0.23	(0.19)	-0.31	(0.19)	0.09*	(0.03)
Communication	direct	0.19***	(0.03)	0.21	(0.15)	0.17	(0.17)	-0.43*	(0.18)	0.07*	(0.03)	6.14 / .01	0.146	0.984	0.789
	indirect	0.00	(.)	0.00	(.)	0.00	(.)	0.00	(.)	0.00	(.)
	total	0.19***	(0.03)	0.21	(0.15)	0.17	(0.17)	-0.43*	(0.18)	0.07*	(0.03)
Collaboration	direct	0.06	(0.03)	0.18	(0.16)	0.18	(0.19)	-0.33	(0.19)	0.08*	(0.03)	.02 / .87	0	1	1.043
	indirect	0.00	(.)	0.00	(.)	0.00	(.)	0.00	(.)	0.00	(.)
	total	0.06	(0.03)	0.18	(0.16)	0.18	(0.19)	-0.33	(0.19)	0.08*	(0.03)
Curiosity	direct	0.09**	(0.03)	0.16	(0.15)	0.20	(0.19)	-0.31	(0.19)	0.09**	(0.03)	6.05 / .01	0.145	0.983	0.78
	indirect	0.00	(.)	0.00	(.)	0.00	(.)	0.00	(.)	0.00	(.)
	total	0.09**	(0.03)	0.16	(0.15)	0.20	(0.19)	-0.31	(0.19)	0.09**	(0.03)
Ethics	direct	0.09**	(0.03)	0.27	(0.16)	0.17	(0.19)	-0.35	(0.19)	0.09**	(0.03)	2.12 / .14	0.068	0.996	0.951
	indirect	0.00	(.)	0.00	(.)	0.00	(.)	0.00	(.)	0.00	(.)
	total	0.09**	(0.03)	0.27	(0.16)	0.17	(0.19)	-0.35	(0.19)	0.09**	(0.03)
Courage	direct	0.11***	(0.03)	0.16	(0.15)	0.22	(0.19)	-0.35	(0.19)	0.09*	(0.03)	3.08 / .07	0.093	0.993	0.909
	indirect	0.00	(.)	0.00	(.)	0.00	(.)	0.00	(.)	0.00	(.)
	total	0.11***	(0.03)	0.16	(0.15)	0.22	(0.19)	-0.35	(0.19)	0.09*	(0.03)
Reslience	direct	0.15***	(0.03)	0.03	(0.15)	0.23	(0.18)	-0.28	(0.18)	0.08*	(0.03)	.61 / .43	0	1	1.016
	indirect	0.00	(.)	0.00	(.)	0.00	(.)	0.00	(.)	0.00	(.)
	total	0.15***	(0.03)	0.03	(0.15)	0.23	(0.18)	-0.28	(0.18)	0.08*	(0.03)
Mindfulness	direct	0.08*	(0.03)	0.13	(0.16)	0.16	(0.19)	-0.34	(0.19)	0.08*	(0.03)	.19 / .65	0	1	1.036
	indirect	0.00	(.)	0.00	(.)	0.00	(.)	0.00	(.)	0.00	(.)
	total	0.08*	(0.03)	0.13	(0.16)	0.16	(0.19)	-0.34	(0.19)	0.08*	(0.03)
Leadership	direct	0.13***	(0.03)	0.17	(0.15)	0.20	(0.18)	-0.24	(0.18)	0.06	(0.03)	1.39 /.23	0.04	0.999	0.983
	indirect	0.00	(.)	0.00	(.)	0.00	(.)	0.00	(.)	0.00	(.)
	total	0.13***	(0.03)	0.17	(0.15)	0.20	(0.18)	-0.24	(0.18)	0.06	(0.03)
Meta-Cognition	direct	0.06	(0.03)	0.16	(0.16)	0.17	(0.19)	-0.33	(0.19)	0.09**	(0.03)	.25 / .61	0	1	1.003
	indirect	0.00	(.)	0.00	(.)	0.00	(.)	0.00	(.)	0.00	(.)
	total	0.06	(0.03)	0.16	(0.16)	0.17	(0.19)	-0.33	(0.19)	0.09**	(0.03)
Growth Mindset	direct	0.16***	(0.03)	0.18	(0.15)	0.14	(0.18)	-0.39*	(0.18)	0.08*	(0.03)	5.35 / .02	0.135	0.986	0.822
	indirect	0.00	(.)	0.00	(.)	0.00	(.)	0.00	(.)	0.00	(.)
	total	0.16***	(0.03)	0.18	(0.15)	0.14	(0.18)	-0.39*	(0.18)	0.08*	(0.03)
Math Post		Math pre		Competency Pre		Male		G7		G9		Yrs_School		Competency Post
Critical Thinking	direct	0.79***	(0.04)	-0.01	(0.02)	-0.06	(0.09)	-0.13	(0.11)	-0.29**	(0.11)	0.01	(0.02)	0.03	(0.02)
	indirect	0.00	(.)	0.11***	(0.03)	0.09	(0.12)	0.15	(0.15)	-0.31*	(0.15)	0.08**	(0.03)	0.00	(.)
	total	0.79***	(0.04)	0.10**	(0.03)	0.03	(0.15)	0.03	(0.18)	-0.60***	(0.18)	0.08*	(0.03)	0.03	(0.02)
Creativity	direct	0.80***	(0.04)	-0.01	(0.02)	-0.04	(0.09)	-0.12	(0.11)	-0.26*	(0.11)	0.01	(0.02)	-0.00	(0.02)
	indirect	0.00	(.)	0.07*	(0.03)	0.09	(0.13)	0.19	(0.15)	-0.25	(0.15)	0.07*	(0.03)	0.00	(.)
	total	0.80***	(0.04)	0.06	(0.03)	0.05	(0.15)	0.07	(0.18)	-0.52**	(0.18)	0.08*	(0.03)	-0.00	(0.02)
Communication	direct	0.80***	(0.04)	-0.01	(0.02)	-0.05	(0.09)	-0.11	(0.11)	-0.26*	(0.11)	0.01	(0.02)	0.01	(0.02)
	indirect	0.00	(.)	0.15***	(0.02)	0.17	(0.12)	0.13	(0.14)	-0.34*	(0.14)	0.06*	(0.03)	0.00	(.)
	total	0.80***	(0.04)	0.14***	(0.03)	0.12	(0.15)	0.02	(0.17)	-0.60***	(0.18)	0.06*	(0.03)	0.01	(0.02)
Collaboration	direct	0.80***	(0.04)	-0.04*	(0.02)	-0.03	(0.09)	-0.14	(0.10)	-0.28**	(0.11)	0.01	(0.02)	0.05*	(0.02)
	indirect	0.00	(.)	0.05	(0.03)	0.15	(0.13)	0.14	(0.15)	-0.26	(0.15)	0.06*	(0.03)	0.00	(.)
	total	0.80***	(0.04)	0.00	(0.03)	0.12	(0.15)	-0.00	(0.18)	-0.54**	(0.18)	0.07*	(0.03)	0.05*	(0.02)
Curiosity	direct	0.79***	(0.04)	0.00	(0.02)	-0.05	(0.09)	-0.11	(0.11)	-0.26*	(0.11)	0.01	(0.02)	0.01	(0.02)
	indirect	0.00	(.)	0.07**	(0.02)	0.13	(0.12)	0.16	(0.15)	-0.25	(0.15)	0.08**	(0.03)	0.00	(.)
	total	0.79***	(0.04)	0.07*	(0.03)	0.08	(0.15)	0.05	(0.18)	-0.51**	(0.18)	0.08*	(0.03)	0.01	(0.02)
Ethics	direct	0.80***	(0.04)	-0.04	(0.02)	-0.08	(0.09)	-0.13	(0.10)	-0.29**	(0.11)	0.00	(0.02)	0.04	(0.02)
	indirect	0.00	(.)	0.07**	(0.03)	0.22	(0.13)	0.14	(0.15)	-0.28	(0.15)	0.07**	(0.03)	0.00	(.)
	total	0.80***	(0.04)	0.03	(0.03)	0.14	(0.16)	0.01	(0.18)	-0.56**	(0.18)	0.07*	(0.03)	0.04	(0.02)
Courage	direct	0.79***	(0.04)	-0.01	(0.02)	-0.06	(0.09)	-0.13	(0.11)	-0.27*	(0.11)	0.01	(0.02)	0.03	(0.02)
	indirect	0.00	(.)	0.09**	(0.03)	0.13	(0.12)	0.17	(0.15)	-0.27	(0.15)	0.07*	(0.03)	0.00	(.)
	total	0.79***	(0.04)	0.08*	(0.03)	0.07	(0.15)	0.05	(0.18)	-0.54**	(0.18)	0.07*	(0.03)	0.03	(0.02)
Reslience	direct	0.80***	(0.04)	-0.00	(0.02)	-0.05	(0.09)	-0.11	(0.11)	-0.26*	(0.11)	0.01	(0.02)	-0.00	(0.02)
	indirect	0.00	(.)	0.12***	(0.02)	0.02	(0.12)	0.18	(0.15)	-0.22	(0.15)	0.06*	(0.03)	0.00	(.)
	total	0.80***	(0.04)	0.12***	(0.03)	-0.03	(0.15)	0.07	(0.18)	-0.49**	(0.18)	0.07*	(0.03)	-0.00	(0.02)
Mindfulness	direct	0.80***	(0.04)	-0.02	(0.02)	-0.05	(0.09)	-0.12	(0.11)	-0.25*	(0.11)	0.01	(0.02)	0.03	(0.02)
	indirect	0.00	(.)	0.07*	(0.03)	0.10	(0.13)	0.13	(0.15)	-0.28	(0.15)	0.07*	(0.03)	0.00	(.)
	total	0.80***	(0.04)	0.05	(0.03)	0.05	(0.15)	0.01	(0.18)	-0.52**	(0.18)	0.07*	(0.03)	0.03	(0.02)
Leadership	direct	0.79***	(0.04)	-0.01	(0.02)	-0.04	(0.09)	-0.12	(0.11)	-0.26*	(0.11)	0.00	(0.02)	0.03	(0.02)
	indirect	0.00	(.)	0.10***	(0.02)	0.13	(0.12)	0.16	(0.15)	-0.19	(0.15)	0.05	(0.03)	0.00	(.)
	total	0.79***	(0.04)	0.09**	(0.03)	0.10	(0.15)	0.04	(0.18)	-0.45*	(0.18)	0.05	(0.03)	0.03	(0.02)
Meta-Cognition	direct	0.80***	(0.04)	-0.01	(0.02)	-0.06	(0.09)	-0.12	(0.11)	-0.25*	(0.11)	0.01	(0.02)	0.03	(0.02)
	indirect	0.00	(.)	0.04	(0.03)	0.13	(0.12)	0.14	(0.15)	-0.26	(0.15)	0.07**	(0.03)	0.00	(.)
	total	0.80***	(0.04)	0.03	(0.03)	0.07	(0.15)	0.01	(0.18)	-0.51**	(0.18)	0.08*	(0.03)	0.03	(0.02)
Growth Mindset	direct	0.78***	(0.04)	0.00	(0.02)	-0.05	(0.09)	-0.11	(0.11)	-0.28**	(0.11)	0.00	(0.02)	0.03	(0.02)
	indirect	0.00	(.)	0.13***	(0.02)	0.14	(0.12)	0.11	(0.14)	-0.30*	(0.14)	0.06*	(0.03)	0.00	(.)
	total	0.78***	(0.04)	0.13***	(0.03)	0.09	(0.15)	0.00	(0.18)	-0.58***	(0.18)	0.07*	(0.03)	0.03	(0.02)
Note: N=241, (SE), * p<0.05 ** p<0.01 *** p<0.001, Chi^2 df (1) for all models

## Sheet: Science
SEM Pathways for Science Academic Outcomes
Competency	Effect											Fit Statistics
Science pre		Competency_Pre		Male		G7		G9		Yrs_School		χ2 / p(χ2)	RMSEA	CFI	TLI
Critical Thinking	direct	0.10***	(0.03)	-0.05	(0.14)	-0.12	(0.16)	-2.66***	(0.17)	0.08**	(0.03)	1.97 / .16	0.064	0.998	0.977
	indirect	0.00	(.)	0.00	(.)	0.00	(.)	0.00	(.)	0.00	(.)
	total	0.10***	(0.03)	-0.05	(0.14)	-0.12	(0.16)	-2.66***	(0.17)	0.08**	(0.03)
Creativity	direct	0.03	(0.03)	-0.03	(0.14)	-0.10	(0.17)	-2.60***	(0.17)	0.07*	(0.03)	.13 / .71	0	1	1.02
	indirect	0.00	(.)	0.00	(.)	0.00	(.)	0.00	(.)	0.00	(.)
	total	0.03	(0.03)	-0.03	(0.14)	-0.10	(0.17)	-2.60***	(0.17)	0.07*	(0.03)
Communication	direct	0.13***	(0.03)	0.02	(0.13)	-0.14	(0.16)	-2.67***	(0.16)	0.06*	(0.03)	2.63 / .10	0.083	0.997	0.963
	indirect	0.00	(.)	0.00	(.)	0.00	(.)	0.00	(.)	0.00	(.)
	total	0.13***	(0.03)	0.02	(0.13)	-0.14	(0.16)	-2.67***	(0.16)	0.06*	(0.03)
Collaboration	direct	0.05	(0.03)	0.01	(0.14)	-0.13	(0.17)	-2.61***	(0.17)	0.07*	(0.03)	.15 / .69	0	1	1.02
	indirect	0.00	(.)	0.00	(.)	0.00	(.)	0.00	(.)	0.00	(.)
	total	0.05	(0.03)	0.01	(0.14)	-0.13	(0.17)	-2.61***	(0.17)	0.07*	(0.03)
Curiosity	direct	0.05	(0.03)	-0.01	(0.14)	-0.11	(0.17)	-2.60***	(0.17)	0.08*	(0.03)	4.30 / .03	0.117	0.994	0.923
	indirect	0.00	(.)	0.00	(.)	0.00	(.)	0.00	(.)	0.00	(.)
	total	0.05	(0.03)	-0.01	(0.14)	-0.11	(0.17)	-2.60***	(0.17)	0.08*	(0.03)
Ethics	direct	0.02	(0.03)	0.02	(0.14)	-0.12	(0.17)	-2.61***	(0.17)	0.08*	(0.03)	.00 / .93	0	1	1.024
	indirect	0.00	(.)	0.00	(.)	0.00	(.)	0.00	(.)	0.00	(.)
	total	0.02	(0.03)	0.02	(0.14)	-0.12	(0.17)	-2.61***	(0.17)	0.08*	(0.03)
Courage	direct	0.09**	(0.03)	-0.02	(0.14)	-0.10	(0.16)	-2.62***	(0.17)	0.07*	(0.03)	.36 / .54	0	1	1.015
	indirect	0.00	(.)	0.00	(.)	0.00	(.)	0.00	(.)	0.00	(.)
	total	0.09**	(0.03)	-0.02	(0.14)	-0.10	(0.16)	-2.62***	(0.17)	0.07*	(0.03)
Reslience	direct	0.09***	(0.03)	-0.09	(0.14)	-0.09	(0.16)	-2.58***	(0.17)	0.07*	(0.03)	.01 / .90	0	1	1.023
	indirect	0.00	(.)	0.00	(.)	0.00	(.)	0.00	(.)	0.00	(.)
	total	0.09***	(0.03)	-0.09	(0.14)	-0.09	(0.16)	-2.58***	(0.17)	0.07*	(0.03)
Mindfulness	direct	0.04	(0.03)	-0.03	(0.14)	-0.13	(0.17)	-2.62***	(0.17)	0.07*	(0.03)	.05 / .82	0	1	1.022
	indirect	0.00	(.)	0.00	(.)	0.00	(.)	0.00	(.)	0.00	(.)
	total	0.04	(0.03)	-0.03	(0.14)	-0.13	(0.17)	-2.62***	(0.17)	0.07*	(0.03)
Leadership	direct	0.11***	(0.03)	-0.01	(0.14)	-0.11	(0.16)	-2.54***	(0.17)	0.06	(0.03)	.18 / .66	0	1	1.019
	indirect	0.00	(.)	0.00	(.)	0.00	(.)	0.00	(.)	0.00	(.)
	total	0.11***	(0.03)	-0.01	(0.14)	-0.11	(0.16)	-2.54***	(0.17)	0.06	(0.03)
Meta-Cognition	direct	0.04	(0.03)	-0.01	(0.14)	-0.13	(0.17)	-2.61***	(0.17)	0.08*	(0.03)	4.5 / .03	0.121	0.994	0.918
	indirect	0.00	(.)	0.00	(.)	0.00	(.)	0.00	(.)	0.00	(.)
	total	0.04	(0.03)	-0.01	(0.14)	-0.13	(0.17)	-2.61***	(0.17)	0.08*	(0.03)
Growth Mindset	direct	0.16***	(0.03)	0.18	(0.15)	0.14	(0.18)	-0.39*	(0.18)	0.08*	(0.03)	.00 / .93	0	1	1.023
	indirect	0.00	(.)	0.00	(.)	0.00	(.)	0.00	(.)	0.00	(.)
	total	0.16***	(0.03)	0.18	(0.15)	0.14	(0.18)	-0.39*	(0.18)	0.08*	(0.03)
Science Post		Science pre		Competency Pre		Male		G7		G9		Yrs_School		Competency Post
Critical Thinking	direct	0.82***	(0.04)	0.01	(0.02)	0.06	(0.09)	-0.10	(0.11)	-0.43**	(0.16)	-0.04	(0.02)	0.04	(0.02)
	indirect	0.00	(.)	0.08***	(0.02)	-0.04	(0.11)	-0.10	(0.13)	-2.17***	(0.18)	0.07**	(0.03)	0.00	(.)
	total	0.82***	(0.04)	0.10**	(0.03)	0.03	(0.15)	-0.20	(0.18)	-2.60***	(0.18)	0.03	(0.03)	0.04	(0.02)
Creativity	direct	0.83***	(0.04)	0.01	(0.02)	0.08	(0.10)	-0.07	(0.11)	-0.36*	(0.16)	-0.04	(0.02)	-0.01	(0.02)
	indirect	0.00	(.)	0.03	(0.02)	-0.02	(0.12)	-0.09	(0.14)	-2.16***	(0.18)	0.06*	(0.03)	0.00	(.)
	total	0.83***	(0.04)	0.04	(0.03)	0.06	(0.15)	-0.16	(0.18)	-2.52***	(0.18)	0.02	(0.03)	-0.01	(0.02)
Communication	direct	0.79***	(0.05)	0.03	(0.02)	0.09	(0.09)	-0.09	(0.11)	-0.47**	(0.17)	-0.04	(0.02)	0.02	(0.02)
	indirect	0.00	(.)	0.10***	(0.02)	0.01	(0.11)	-0.11	(0.13)	-2.12***	(0.18)	0.05*	(0.02)	0.00	(.)
	total	0.79***	(0.05)	0.14***	(0.03)	0.11	(0.14)	-0.20	(0.17)	-2.58***	(0.17)	0.01	(0.03)	0.02	(0.02)
Collaboration	direct	0.83***	(0.04)	-0.01	(0.02)	0.08	(0.10)	-0.08	(0.11)	-0.35*	(0.16)	-0.04	(0.02)	0.00	(0.02)
	indirect	0.00	(.)	0.04	(0.02)	0.01	(0.12)	-0.11	(0.14)	-2.17***	(0.18)	0.06*	(0.03)	0.00	(.)
	total	0.83***	(0.04)	0.04	(0.03)	0.09	(0.15)	-0.18	(0.18)	-2.52***	(0.18)	0.02	(0.03)	0.00	(0.02)
Curiosity	direct	0.81***	(0.04)	0.04	(0.02)	0.08	(0.09)	-0.07	(0.11)	-0.39*	(0.16)	-0.03	(0.02)	0.01	(0.02)
	indirect	0.00	(.)	0.04	(0.02)	-0.01	(0.11)	-0.09	(0.14)	-2.12***	(0.18)	0.06*	(0.03)	0.00	(.)
	total	0.81***	(0.04)	0.08*	(0.03)	0.08	(0.15)	-0.16	(0.18)	-2.50***	(0.18)	0.03	(0.03)	0.01	(0.02)
Ethics	direct	0.83***	(0.04)	-0.00	(0.02)	0.10	(0.10)	-0.09	(0.11)	-0.38*	(0.16)	-0.04	(0.02)	0.03	(0.02)
	indirect	0.00	(.)	0.02	(0.02)	0.02	(0.12)	-0.10	(0.14)	-2.16***	(0.18)	0.06*	(0.03)	0.00	(.)
	total	0.83***	(0.04)	0.02	(0.03)	0.11	(0.15)	-0.20	(0.18)	-2.55***	(0.18)	0.02	(0.03)	0.03	(0.02)
Courage	direct	0.81***	(0.04)	0.03	(0.02)	0.08	(0.09)	-0.08	(0.11)	-0.41*	(0.16)	-0.04	(0.02)	0.02	(0.02)
	indirect	0.00	(.)	0.08**	(0.02)	-0.01	(0.11)	-0.08	(0.13)	-2.13***	(0.18)	0.06*	(0.02)	0.00	(.)
	total	0.81***	(0.04)	0.10**	(0.03)	0.07	(0.15)	-0.16	(0.18)	-2.54***	(0.18)	0.02	(0.03)	0.02	(0.02)
Reslience	direct	0.82***	(0.04)	0.01	(0.02)	0.07	(0.10)	-0.08	(0.11)	-0.37*	(0.16)	-0.04	(0.02)	0.03	(0.02)
	indirect	0.00	(.)	0.07***	(0.02)	-0.08	(0.11)	-0.08	(0.13)	-2.11***	(0.18)	0.06*	(0.03)	0.00	(.)
	total	0.82***	(0.04)	0.08**	(0.03)	-0.01	(0.15)	-0.16	(0.18)	-2.48***	(0.18)	0.02	(0.03)	0.03	(0.02)
Mindfulness	direct	0.82***	(0.04)	0.04	(0.02)	0.07	(0.09)	-0.09	(0.11)	-0.39*	(0.16)	-0.04	(0.02)	-0.02	(0.02)
	indirect	0.00	(.)	0.03	(0.03)	-0.02	(0.12)	-0.11	(0.14)	-2.15***	(0.18)	0.06*	(0.03)	0.00	(.)
	total	0.82***	(0.04)	0.07*	(0.03)	0.05	(0.15)	-0.19	(0.18)	-2.54***	(0.18)	0.02	(0.03)	-0.02	(0.02)
Leadership	direct	0.82***	(0.04)	-0.00	(0.02)	0.09	(0.10)	-0.08	(0.11)	-0.36*	(0.16)	-0.04	(0.02)	0.01	(0.02)
	indirect	0.00	(.)	0.09***	(0.02)	-0.01	(0.11)	-0.09	(0.13)	-2.10***	(0.18)	0.05	(0.03)	0.00	(.)
	total	0.82***	(0.04)	0.09**	(0.03)	0.09	(0.15)	-0.17	(0.18)	-2.46***	(0.18)	0.01	(0.03)	0.01	(0.02)
Meta-Cognition	direct	0.83***	(0.04)	0.02	(0.02)	0.08	(0.09)	-0.09	(0.11)	-0.36*	(0.16)	-0.04	(0.02)	0.01	(0.02)
	indirect	0.00	(.)	0.03	(0.02)	-0.01	(0.12)	-0.11	(0.14)	-2.16***	(0.18)	0.06*	(0.03)	0.00	(.)
	total	0.83***	(0.04)	0.05	(0.03)	0.07	(0.15)	-0.20	(0.18)	-2.52***	(0.18)	0.03	(0.03)	0.01	(0.02)
Growth Mindset	direct	0.78***	(0.04)	0.00	(0.02)	-0.05	(0.09)	-0.11	(0.11)	-0.28**	(0.11)	0.00	(0.02)	0.03	(0.02)
	indirect	0.00	(.)	0.13***	(0.02)	0.14	(0.12)	0.11	(0.14)	-0.30*	(0.14)	0.06*	(0.03)	0.00	(.)
	total	0.78***	(0.04)	0.13***	(0.03)	0.09	(0.15)	0.00	(0.18)	-0.58***	(0.18)	0.07*	(0.03)	0.03	(0.02)
Note: N=241, (SE), * p<0.05 ** p<0.01 *** p<0.001, Chi^2 df (1) for all models
